# Supplementary material for: Genome-wide analysis of WRKY gene family in the sesame genome and identification of the WRKY genes involved in responses to abiotic stresses
Source: PubMed Central journal article supplement (PMC5594535; doi:10.1186/s12870-017-1099-y), 2017-09-11

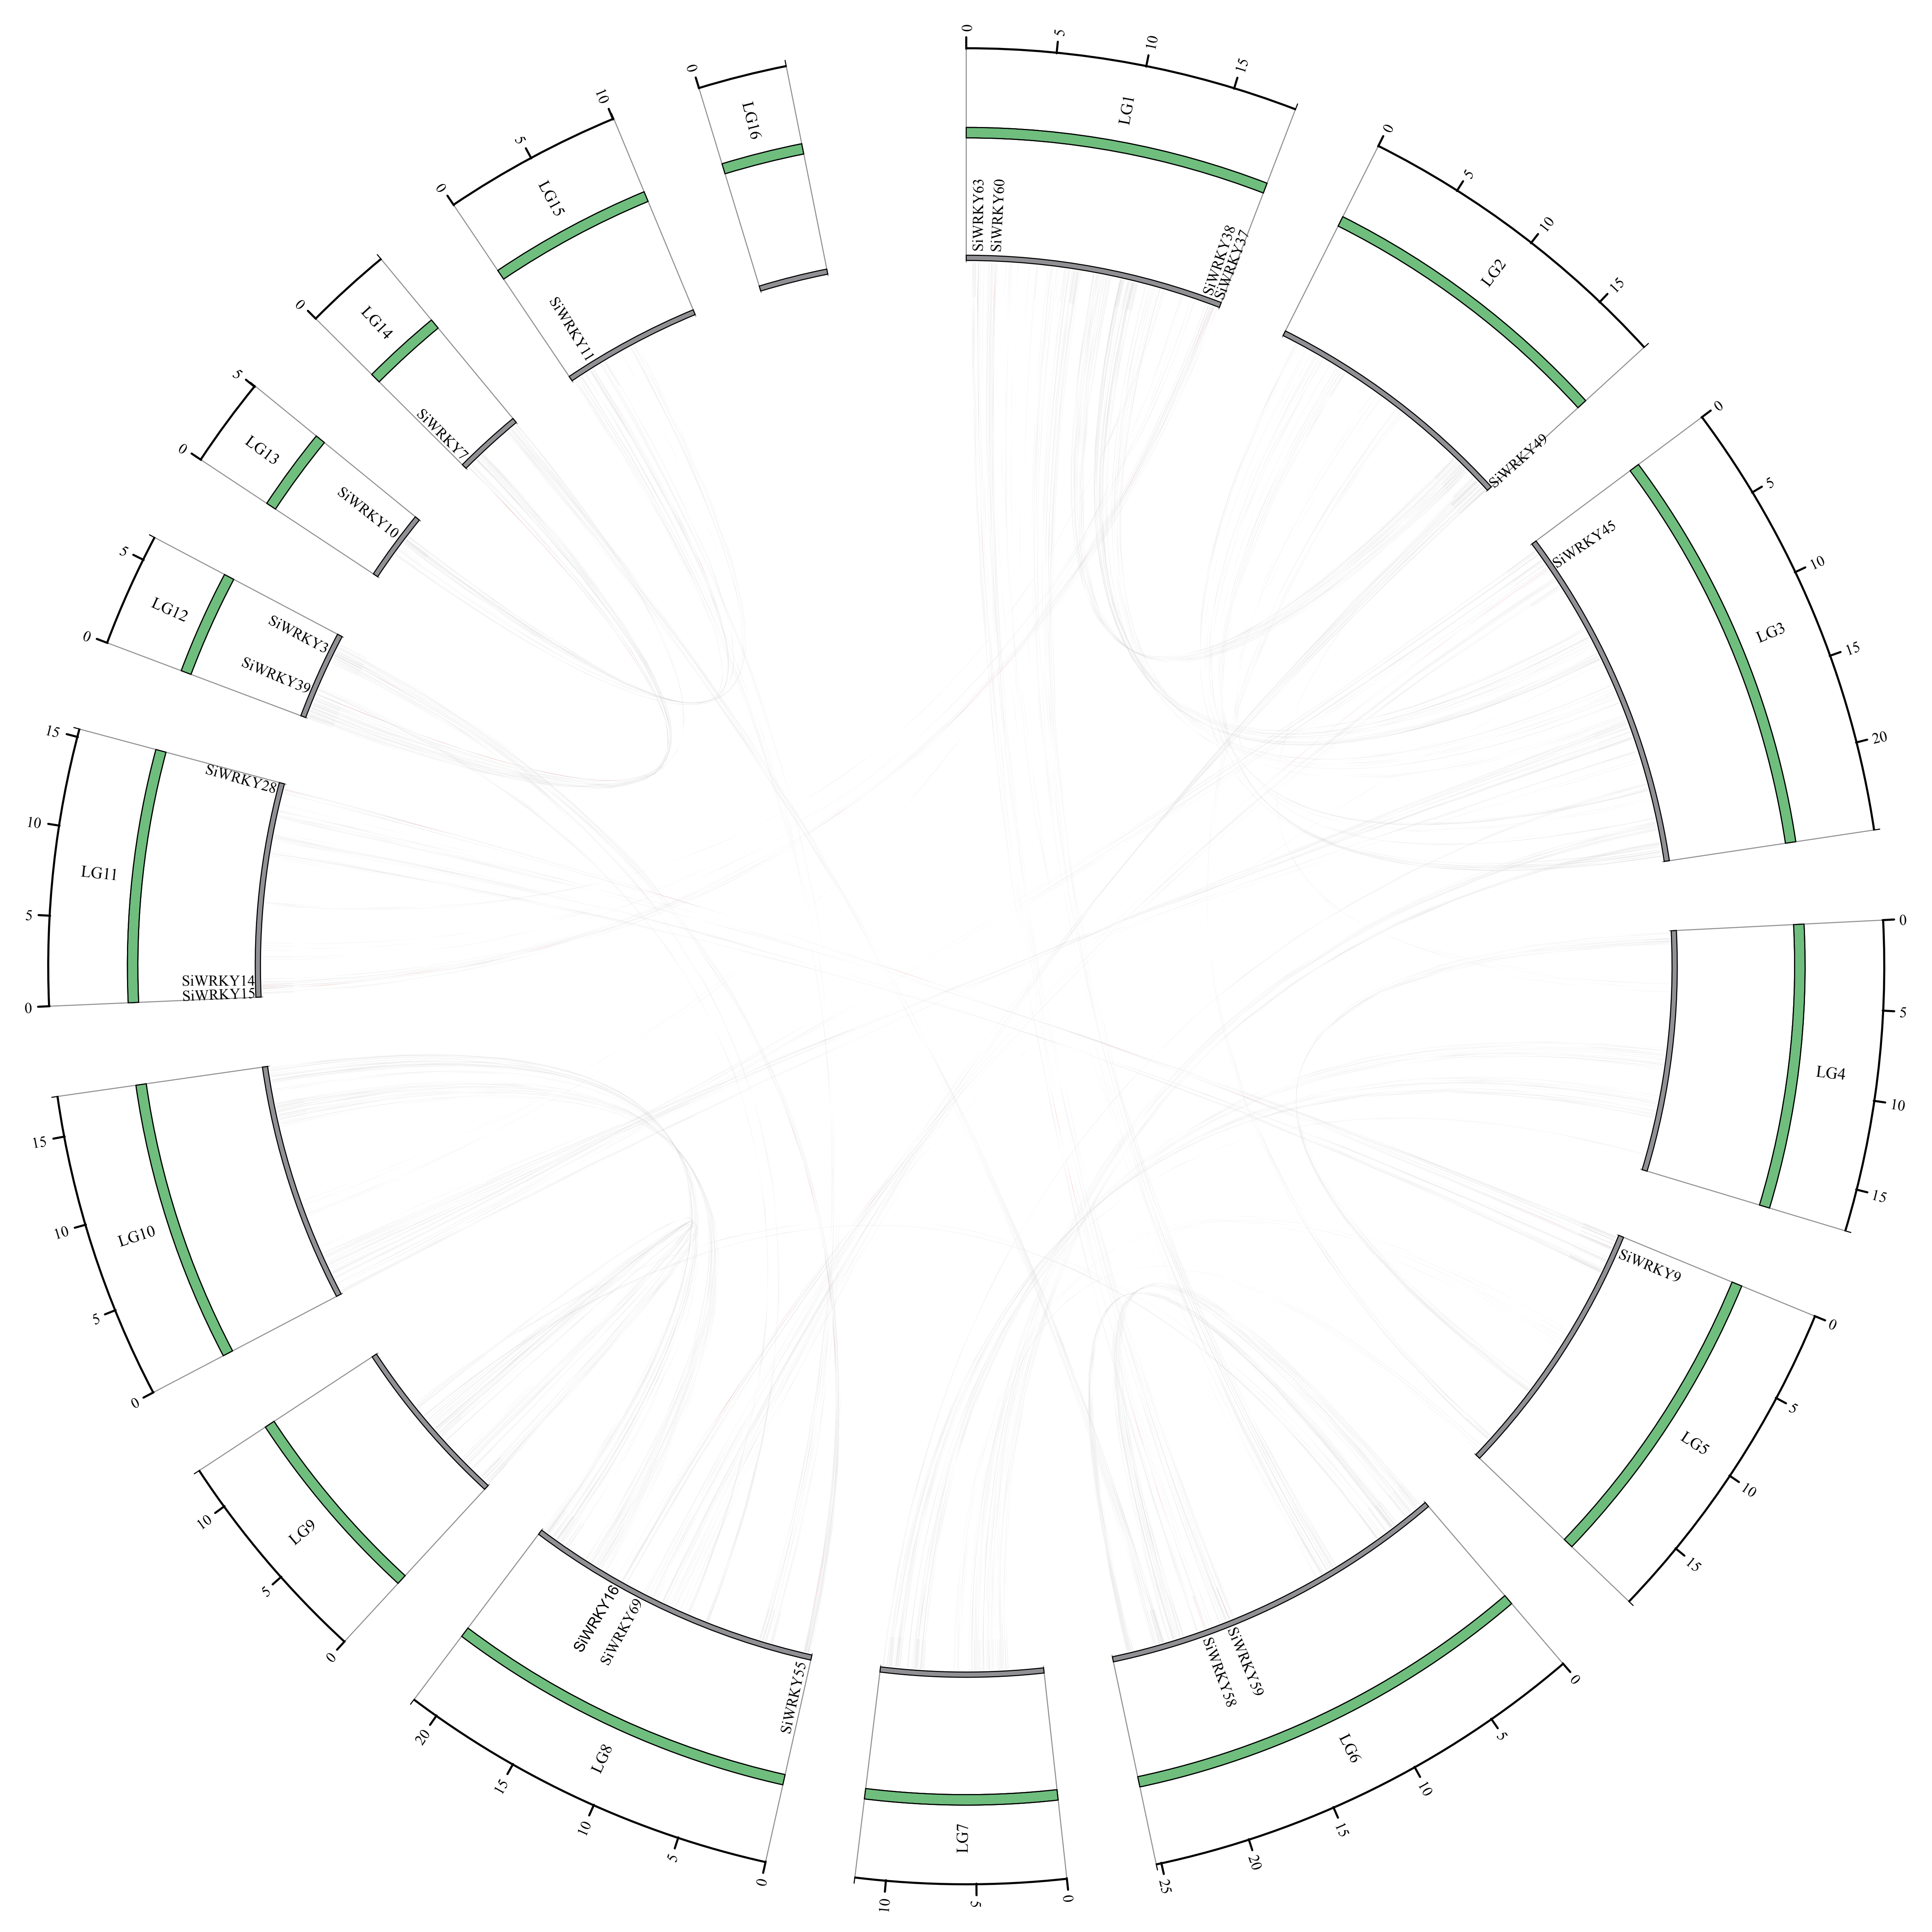

Supplement: 12870_2017_1099_MOESM1_ESM.pdf [file 12870_2017_1099_MOESM1_ESM.pdf]
