# Supplementary material for: Genome-wide analysis of WRKY gene family in the sesame genome and identification of the WRKY genes involved in responses to abiotic stresses
Source: BMC Plant Biol. 2017 Sep 11;17:152. doi: 10.1186/s12870-017-1099-y (PMC5594535; doi:10.1186/s12870-017-1099-y)
Supplement: Supplementary file 3 — Conserved motifs of WRKY proteins in sesame. Significant motifs of more than 10 aa in length were predicted using MEME analysis. The motif IDs, consensus sequence lengths in aa, and e-value of each predicted motif are shown. (PDF 234 kb) [file 12870_2017_1099_MOESM3_ESM.pdf]

|     | Logo | E-value   | Sites | Width |
|-----|------|-----------|-------|-------|
| 1.  |      | 1.7e-1476 | 64    | 29    |
| 2.  |      | 1.0e-1136 | 64    | 29    |
| 3.  |      | 1.1e-284  | 12    | 36    |
| 4.  |      | 4.6e-201  | 34    | 21    |
| 5.  |      | 7.9e-130  | 13    | 26    |
| 6.  |      | 2.7e-122  | 14    | 29    |
| 7.  |      | 3.1e-107  | 14    | 29    |
| 8.  |      | 5.7e-088  | 15    | 36    |
| 9.  |      | 2.5e-068  | 9     | 29    |
| 10. |      | 4.0e-057  | 11    | 15    |
